# Supplementary material
Source: HighWire-hosted journal article supplement (https://tech.snmjournals.org/highwire/filestream/8626/field_highwire_adjunct_files/0/88351_supplemental_data.pdf)

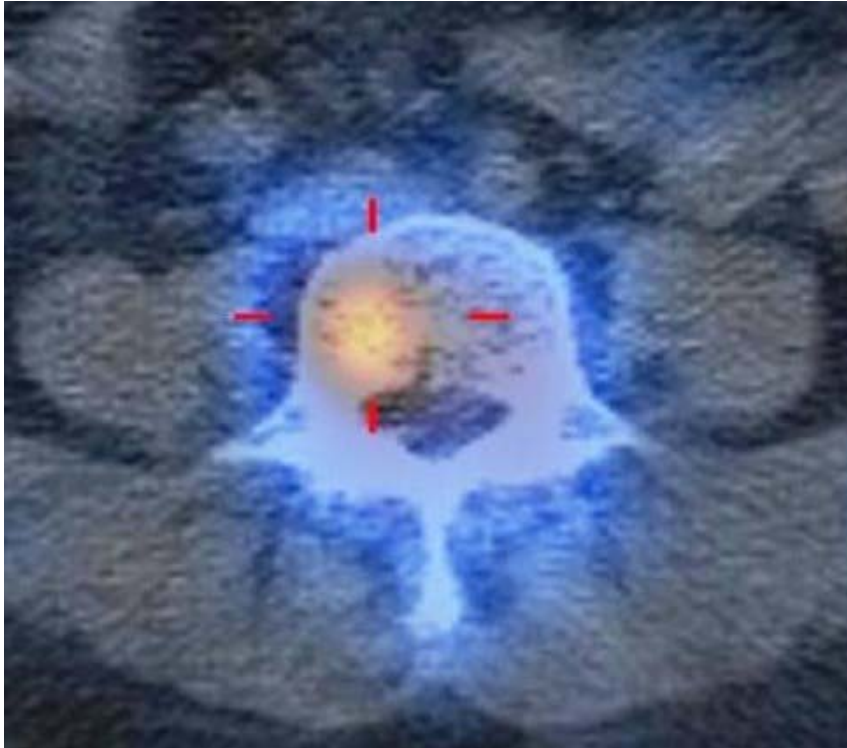

Figure 2

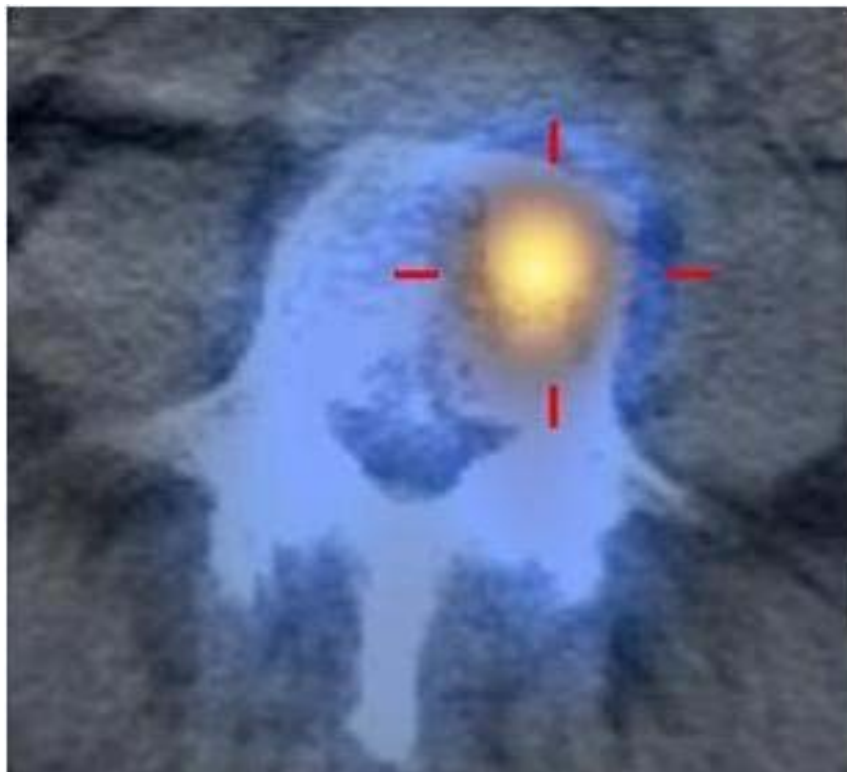

Figure 4

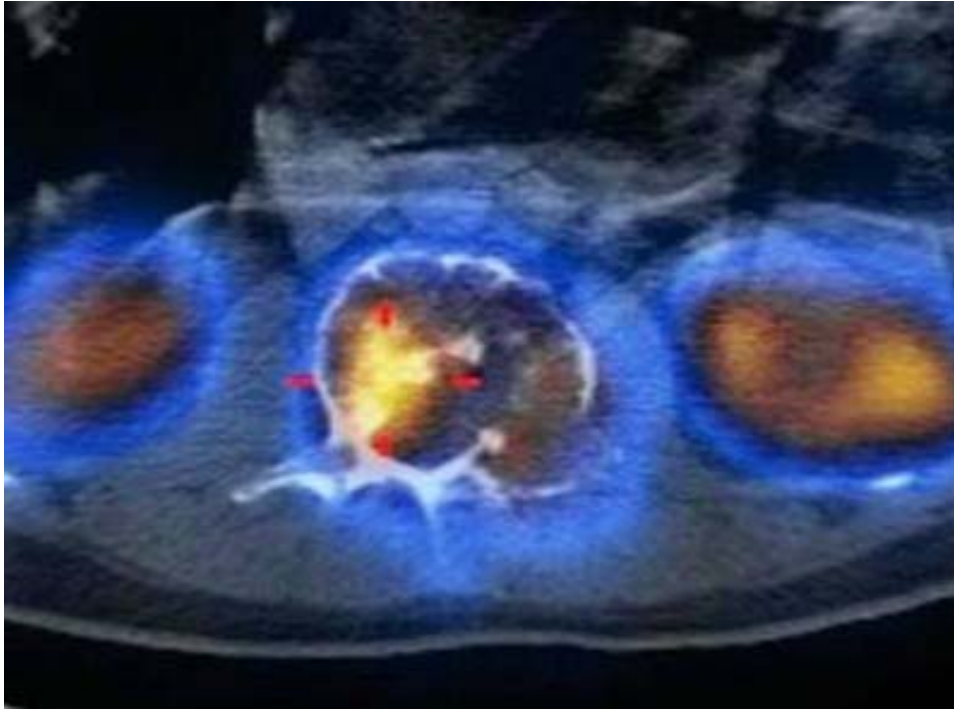

Figure 7

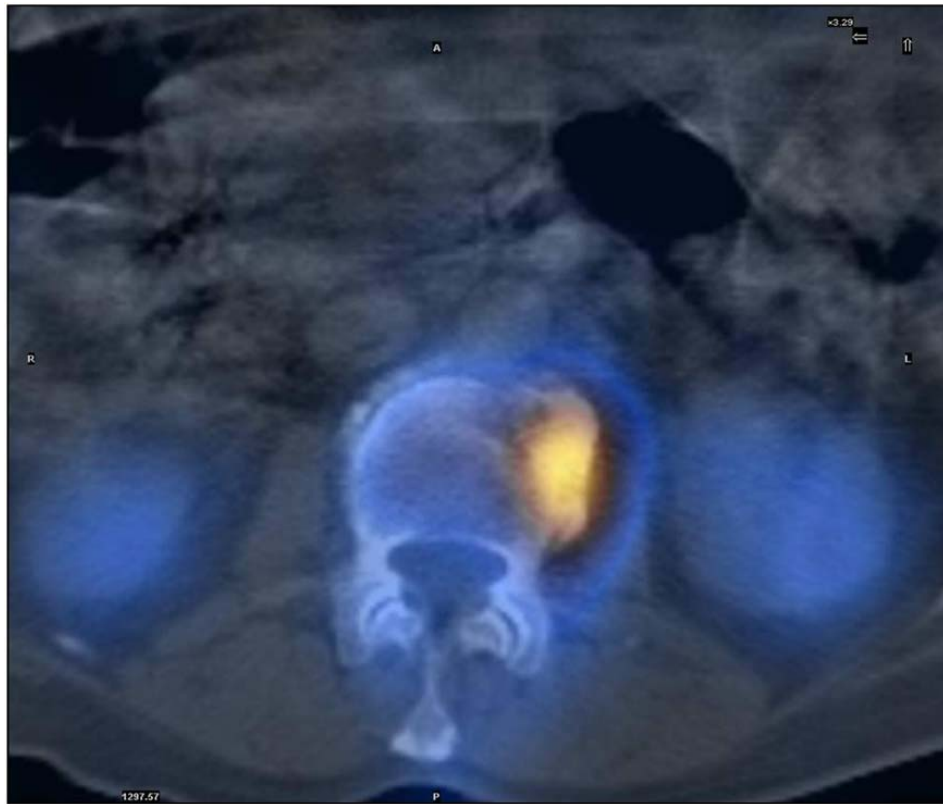

Figure 9

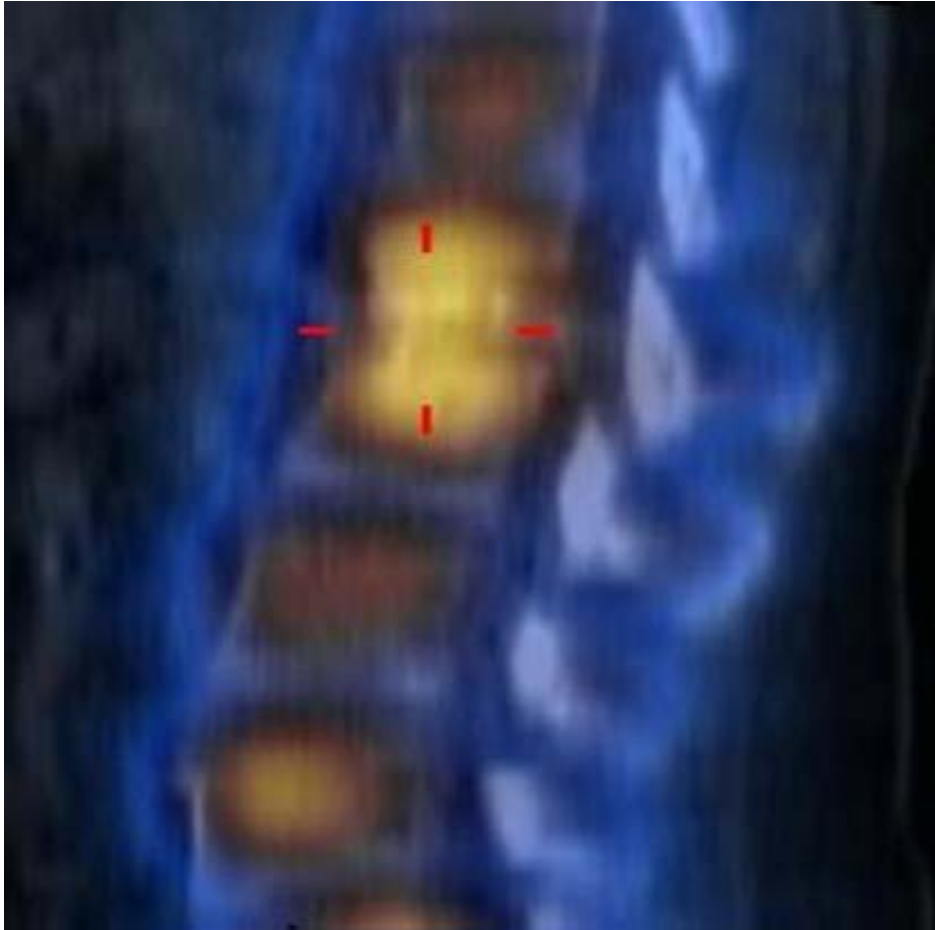

Figure 11

Supplement: 88351_supplemental_data.pdf [file 88351_supplemental_data.pdf]
